# Supplementary material for: Hemolytic E. coli Promotes Colonic Tumorigenesis in Females
Source: Oxford University Press journal article supplement (doi:10.1158/0008-5472.can-15-2083), 2016-03-24
Supplement: 00085472can152083-sup-153451_1_supp_data_3318499_p18qyp.docx [file 00085472can152083-sup-153451_1_supp_data_3318499_p18qyp.docx]

**Supplementary Table S1.** Clinical data of patients with CRC, adenomas, and healthy subjects in the search for CRC-associated fecal *E. coli*

| Category | Healthy | |  |  | Adenomaa | |  |  | CRC | |  |
| --- | --- | --- | --- | --- | --- | --- | --- | --- | --- | --- | --- |
| Male | Female | *P* value |  | Male | Female | *P* value |  | Male | Female | *P* value |
| No. of casesb | 25 | 60 | n/a |  | 30 | 29 | n/a |  | 47 | 36 | n/a |
| Age, year (SD) | **57.5 (5.5)** | **60.3 (4.9)** | **0.025** |  | 60 (5.6) | 61.2 (4.3) | 0.343 |  | 68.2 (7.7) | 67.1 (10.8) | 0.417 |
| Smokingc, No. (%) |  |  |  |  |  |  |  |  |  |  |  |
| Smoker  Ex-smoker  Non-smoker  No information | ―  ―  ―  ― | ―  ―  ―  ― | ―  ―  ―  ― |  | ―  ―  ―  ― | ―  ―  ―  ― | ―  ―  ―  ― |  | 4 (8.51)  **21 (44.7)**  **19 (40.4)**  3 (6.4) | 0 (0)  **0 (0)**  **30 (83.3)**  6 (16.7) | 0.097  **<0.001**  **<0.001**  0.128 |
| TNM stage, No. (%)  I | ― | ― | ― |  | ― | ― | ― |  | 11 (23.4) | 6 (16.7) | 0.318 |
| II | ― | ― | ― |  | ― | ― | ― |  | 21 (44.7) | 11 (30.6) | 0.139 |
| III | ― | ― | ― |  | ― | ― | ― |  | **10 (21.3)** | **15 (41.7)** | **0.039** |
| IV | ― | ― | ― |  | ― | ― | ― |  | 4 (8.5) | 3 (8.3) | 0.648 |
| No information | ― | ― | ― |  | ― | ― | ― |  | 1 (2.1) | 1 (2.8) | 0.682 |

aAdenoma is deﬁned as adenomas < 1 cm in diameter without significant villous feature or high-grade dysplasia.

bAll subjects are local Chinese people without a family history of adenomatous polyposis or hereditary nonpolyposis CRC, previous colonic surgery, or use of antibiotics within 4 weeks before sample collection.

cSmoking information was not collected for healthy subjects and patients with adenoma.
