# Supplementary material for: Hemolytic E. coli Promotes Colonic Tumorigenesis in Females
Source: Oxford University Press journal article supplement (doi:10.1158/0008-5472.can-15-2083), 2016-03-24
Supplement: 00085472can152083-sup-153451_1_supp_data_3318501_w18qyw.docx [file 00085472can152083-sup-153451_1_supp_data_3318501_w18qyw.docx]

**Supplementary Table S3.** Cancer-associated gene fold regulation by *E. coli* strains in the NCM460 cell line, identified using the Human Cancer PathwayFinder™ RT² Profiler™ PCR Array

| **Genes** | **functions** | **≥ 2 fold-upregulation relative to PBS** | | | **J47 vs Δ*hly***  **(≥2 folds)** |
| --- | --- | --- | --- | --- | --- |
| **MG1655** | **J47Δ*hly*** | **J47** |
| CCL2 | Angiogenesis |  |  | 4.32 | 3.36 |
| FGF2 | Angiogenesis |  | 2.53 | 2.73 |  |
| BIRC3 | Anti-apoptosis |  |  | 2.25 |  |
| E2F4 | Cell Cycle |  |  | 2.39 |  |
| FOXC2 | Epithelial-to-Mesenchymal Transition |  |  | 2.64 | 2.43 |
| SLC2A1 | Glucose transportation |  | 2.23 | 6.32 | 2.83 |
| PFKL | Metabolism |  | 2.85 | 4.23 |  |
| GPD2 | Metabolism |  |  | 2.11 |  |
| ACLY | Metabolism |  |  | 2.87 |  |
| CPT2 | Metabolism |  |  | 2.14 |  |
| TINF2 | Telomeres & Telomerase |  | 2.31 | 3.29 |  |
| BCL2L11 | Apoptosis |  |  | 3.2 | 2.23 |
| MAPK14 | Cell Senescence |  |  | 3.01 |  |
| IGFBP5 | Cell Senescence |  | 8.63 |  |  |
| DDB2 | DNA Repair |  |  | 2.11 |  |
| ADM | Angiogenesis | 5.39 | 8.22 | 12.82 |  |
| SERPINF1 | Angiogenesis | 6251.56 |  | 5.86 |  |
| PGF | Angiogenesis | 3.84 |  |  |  |
| BMI1 | Anti-cell senescence | 2.45 | 2.79 | 2.5 |  |
| APAF1 | Apoptosis | 2.55 |  | 4.2 |  |
| CASP9 | Apoptosis | 2.85 | 3.23 | 3.58 |  |
| DDIT3 | DNA Repair | 2.13 | 2.17 | 2.62 |  |
| PPP1R15A | DNA Repair | 2.53 | 3.29 | 11 |  |
| GADD45G | DNA Repair | 11.08 | 14.72 | 38.05 |  |
| SNAI1 | Epithelial-to-Mesenchymal Transition | 2.58 |  |  |  |
| SNAI2 | Epithelial-to-Mesenchymal Transition | 2.91 | 3.16 |  |  |
| CA9 | Response to hypoxia | 3.39 | 11.96 | 3.97 |  |
| ARNT | Response to hypoxia | 2.27 |  | 2.03 |  |
| HMOX1 | Response to hypoxia | 2.41 |  | 3.58 |  |
| WEE1 | Cell cycle | 2.2 |  |  |  |
| DKC1 | tumor suppressor | 2.33 | 2.22 |  |  |
| **Genes** | **functions** | **≥ 2 fold-downegulation relative to PBS** | | | **J47 vs Δ*hly***  **(≥2 folds)** |
| **MG1655** | **J47Δ*hly*** | **J47** |
| ANGPT2 | Angiogenesis |  | -2.22 | -2.11 |  |
| CFLAR | Anti-apoptosis |  | -2.73 |  |  |
| TBX2 | Cell Senescence |  |  | -2.41 |  |
| TERF2IP | Telomeres & Telomerase |  |  | -2.08 | -3.18 |
| IGFBP5 | Cell Senescence | -45.89 |  | -45.25 | -390.72 |
| IGFBP7 | Cell Senescence | -6.73 | -6.15 | -6.63 |  |
| KRT14 | Epithelial-to-Mesenchymal Transition | -4.79 | -4.82 |  |  |
| ANGPT1 | Angiogenesis | -2.6 |  |  |  |

Grey, gene regulation by MG1655 that is irrelevant to adenoma/CRC development

Yellow, *hly*-dependent gene regulation
